# Supplementary material
Source: ML conference proceedings conference paper supplement (https://proceedings.mlr.press/v97/adams19a.html)
Supplement: Supplementary file 1 [file adams19a-supp.pdf]

---

# Supplementary Materials for Learning Models from Data with Measurement Error: Tackling Underreporting

---

Roy Adams<sup>1</sup> Yuelong Ji<sup>2</sup> Xiaobin Wang<sup>2</sup> Suchi Saria<sup>1,3,4</sup>

## 1. Proof of Corollary 1 for probit and cloglog models

In this section we prove Corollary 1 in Section 4.3 of the main paper for the cases of probit and cloglog regression.

*Proof.* Following the proof for logistic regression, a probit regression model violates the condition in Theorem 1 if

$$\sqrt{2} \operatorname{erf}^{-1} \left( \alpha - 1 + \alpha \operatorname{erf} \left( \frac{\phi x}{\sqrt{2}} \right) \right) = \phi' x$$

Similarly, a cloglog regression model violates the condition in Theorem 1 if

$$\log(-\log(1 - \alpha + \alpha \exp(-\exp(\phi x)))) = \phi' x$$

In both of these cases, the function on the left hand side is non-linear for  $\alpha < 1$ , so these equalities can only be true if  $\phi x$  and  $\phi' x$  are constants which is true only when  $A \perp X$ .  $\square$

---

<sup>1</sup>Department of Computer Science, Johns Hopkins University

<sup>2</sup>Center on the Life Origins of Disease, Department of Population, Family, and Reproductive Health, Johns Hopkins University Bloomberg School of Public Health <sup>3</sup>Department of Applied Math and Statistics, Johns Hopkins University <sup>4</sup>Bayesian Health. Correspondence to: Roy Adams <roy.james.adams@gmail.com>.
